# Supplementary material for: Aerosol dynamics within and above forest in relation to turbulent transport and dry deposition
Source: Copernicus journal article supplement (doi:10.5194/acp-16-3145-2016), 2016-03-09
Supplement: Supplementary file [file acp-16-3145-2016-supplement-title-page.pdf › acp-16-3145-2016-supplement-title-page.pdf]

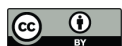

## *Supplement of*

# **Aerosol dynamics within and above forest in relation to turbulent transport and dry deposition**

Üllar Rannik et al.

*Correspondence to:* Üllar Rannik ([ullar.rannik@heuristic.ee](mailto:ullar.rannik@heuristic.ee))

- [acp-16-3145-2016-supplement-title-page.pdf](#)
- [acp-2015-422-Supplement.docx](#)
- [FS1.pdf](#)
- [FS2.pdf](#)
- [FS3.pdf](#)
- [FS4.pdf](#)
- [FS5.pdf](#)

The copyright of individual parts of the supplement might differ from the CC-BY 3.0 licence.
