# Supplementary figures and images for: Aerosol dynamics within and above forest in relation to turbulent transport and dry deposition
Source: Copernicus journal article supplement (doi:10.5194/acp-16-3145-2016), 2016-03-09

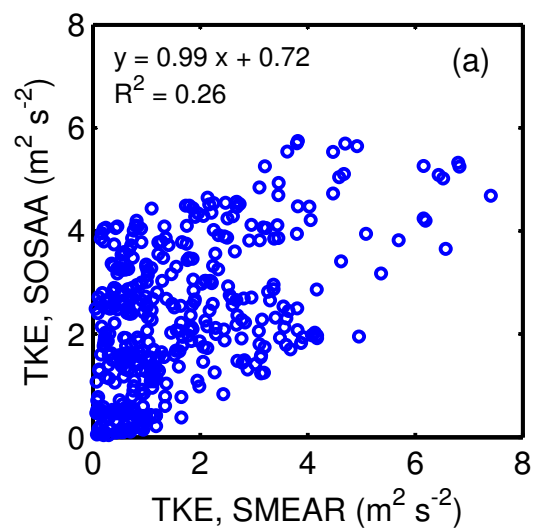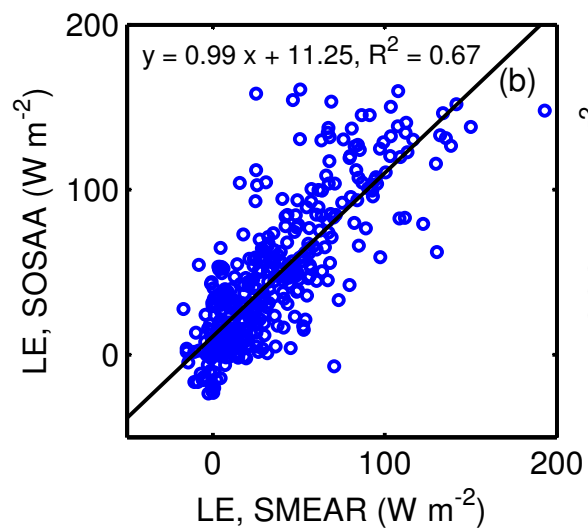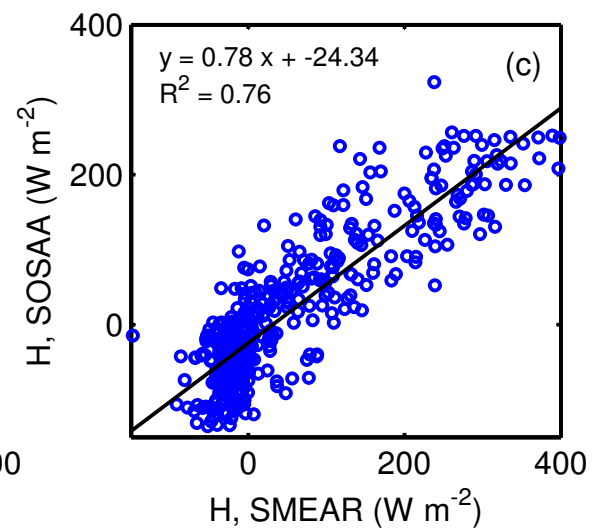

Supplement: Supplementary file 1 [file FS1.pdf › FS1.pdf]

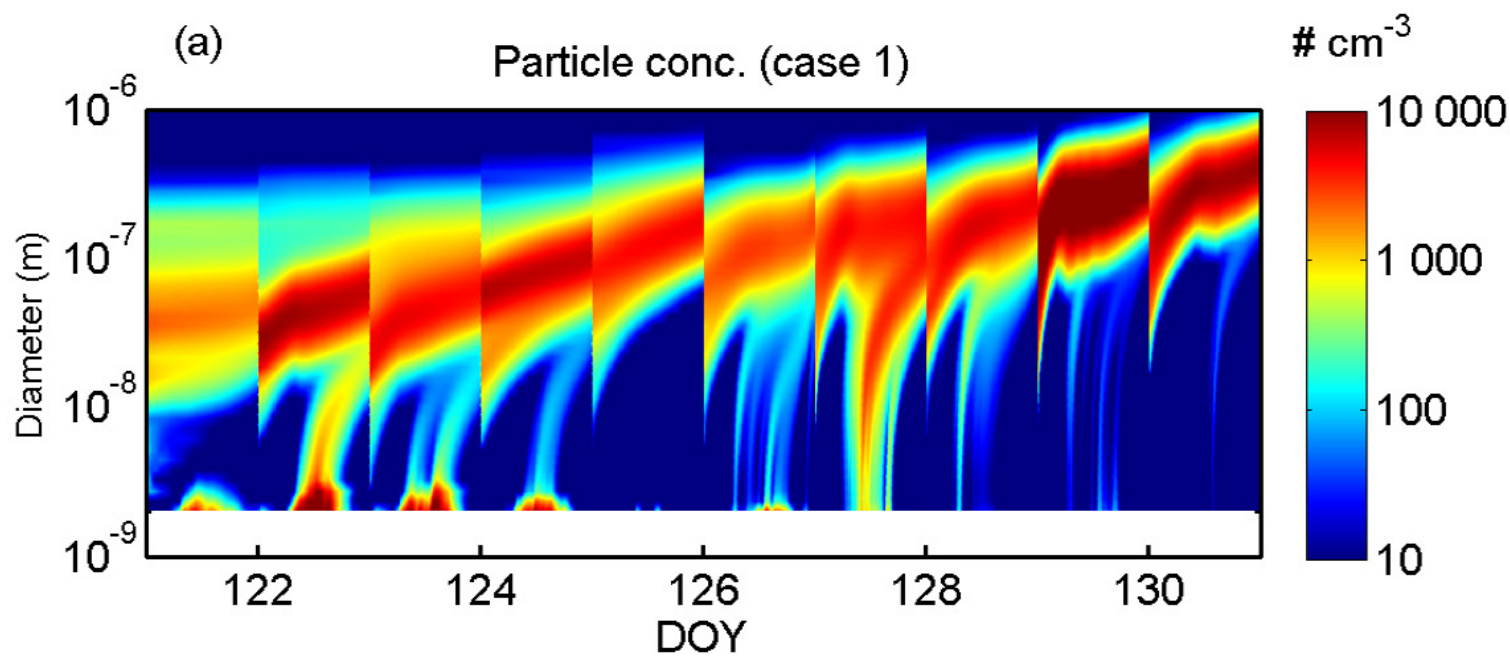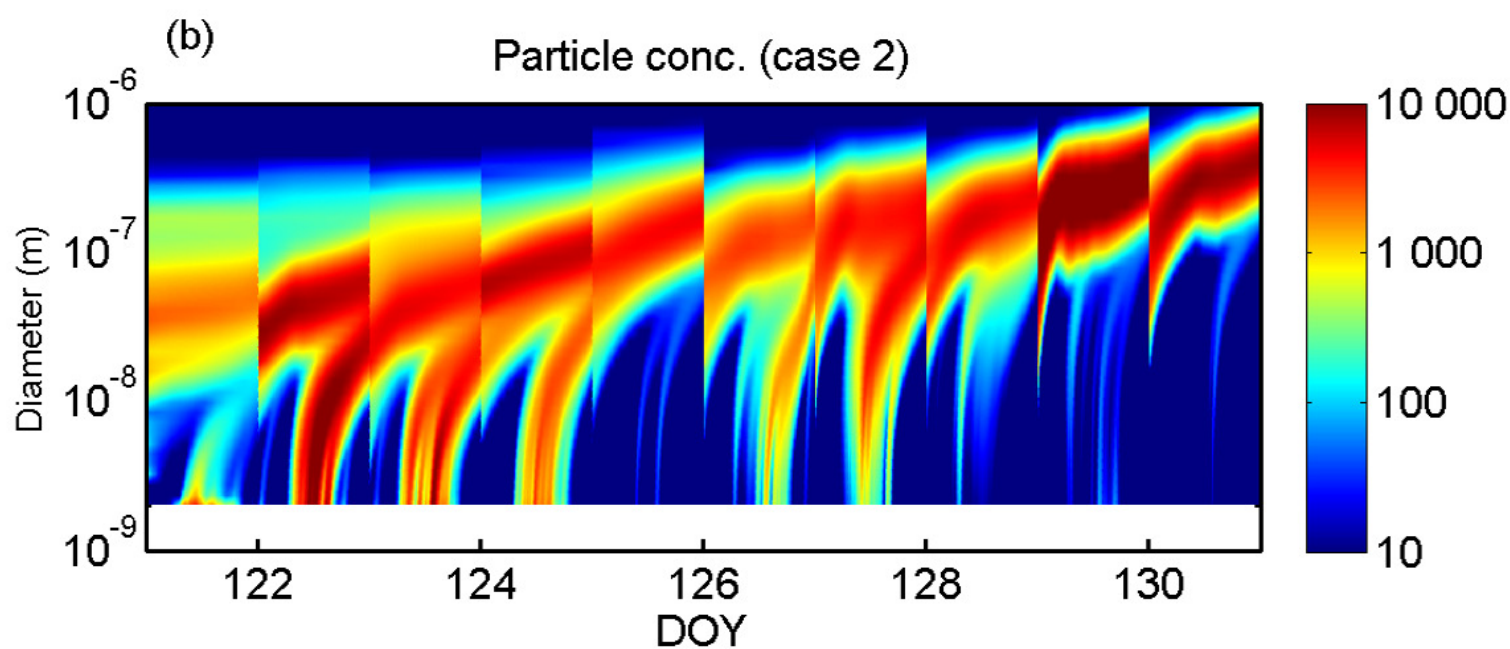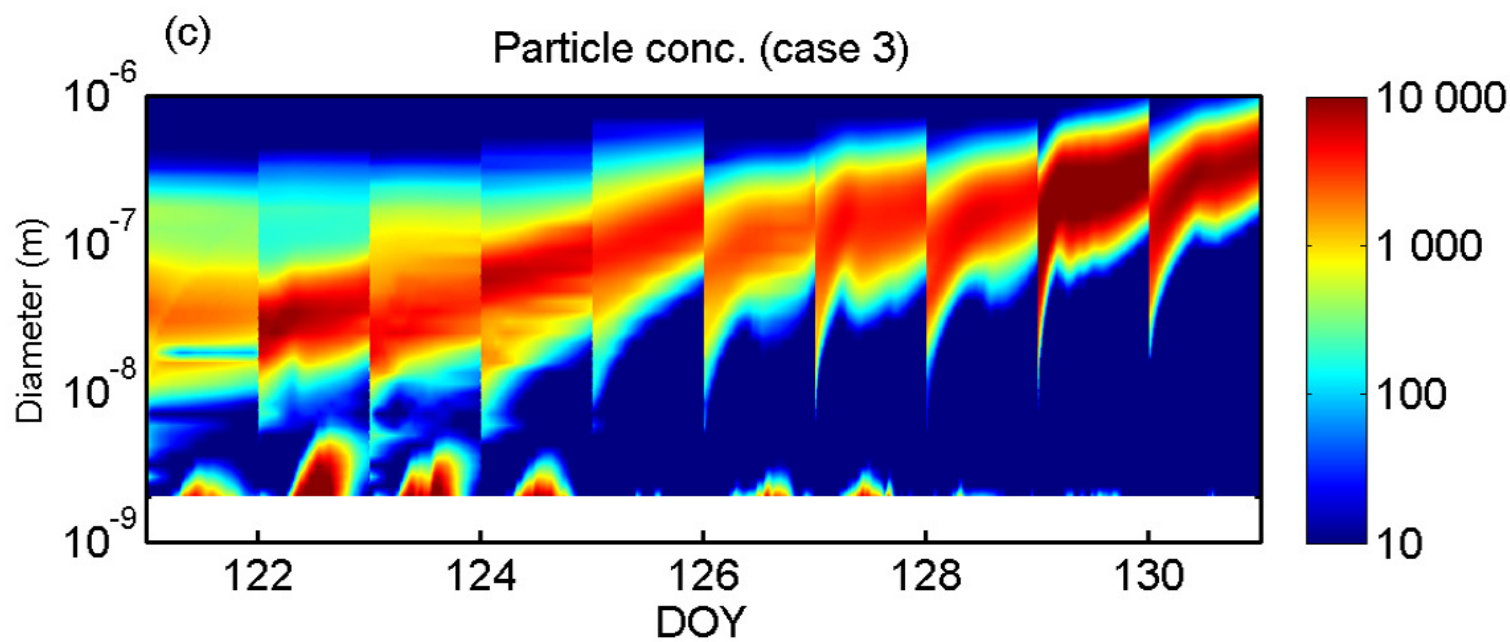

Supplement: Supplementary file 2 [file FS2.pdf › FS2.pdf]

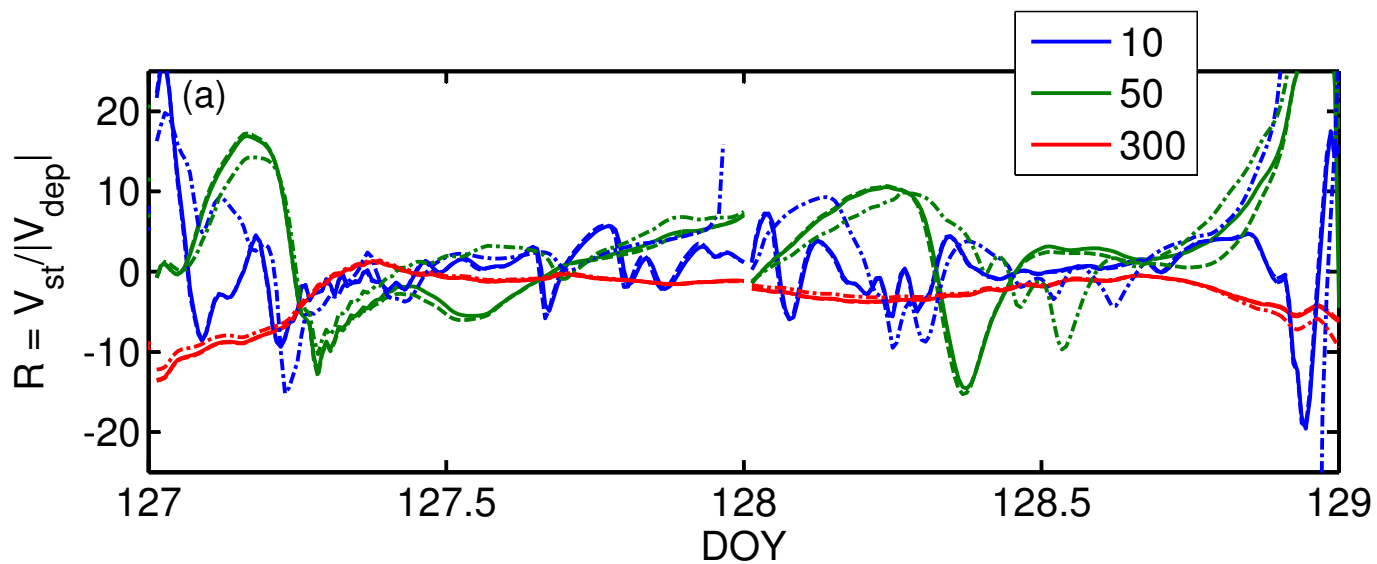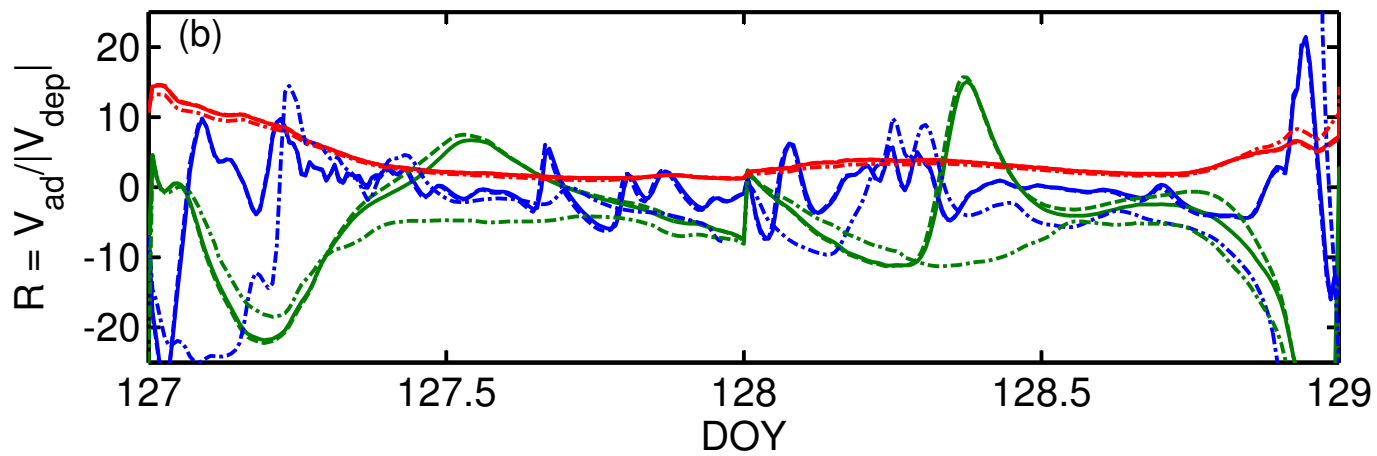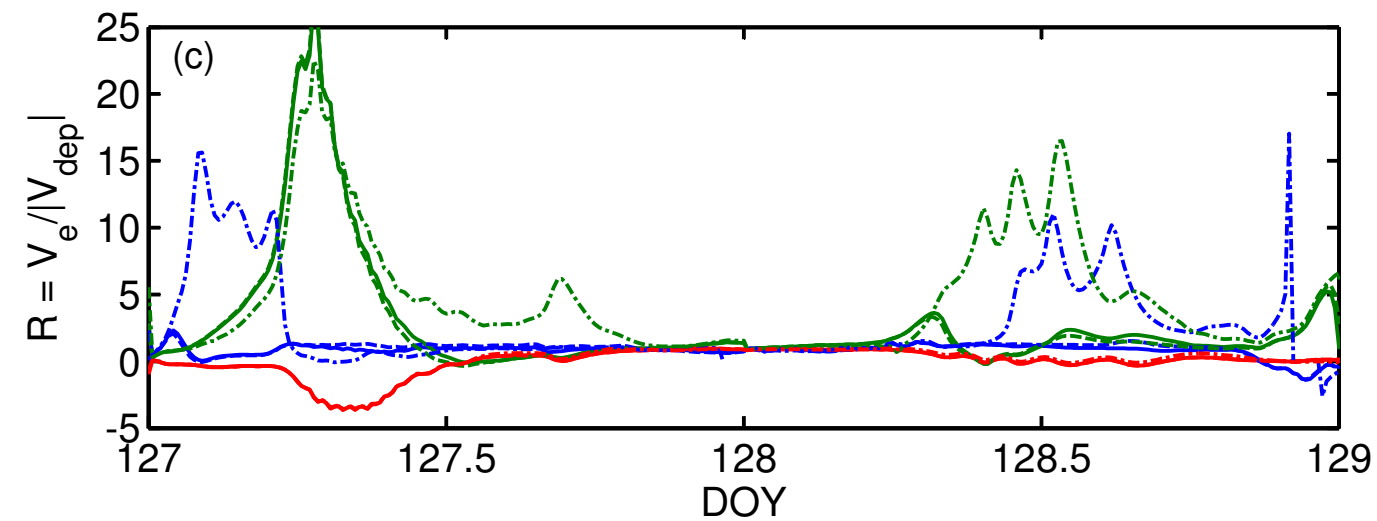

Supplement: Supplementary file 3 [file FS3.pdf › FS3.pdf]

Case 1

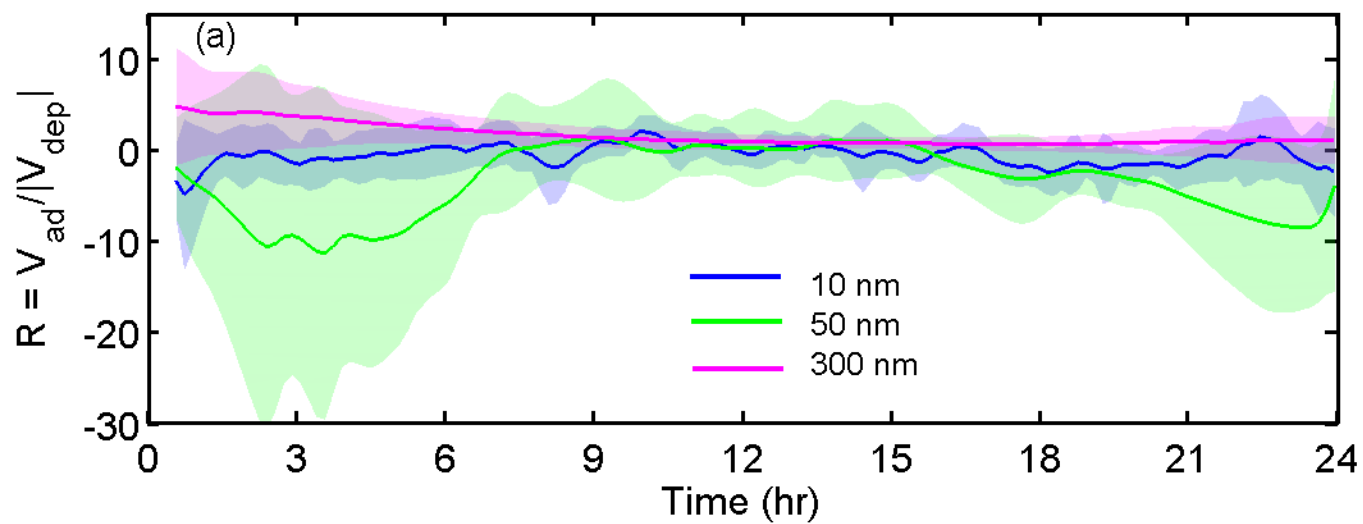

Case 2

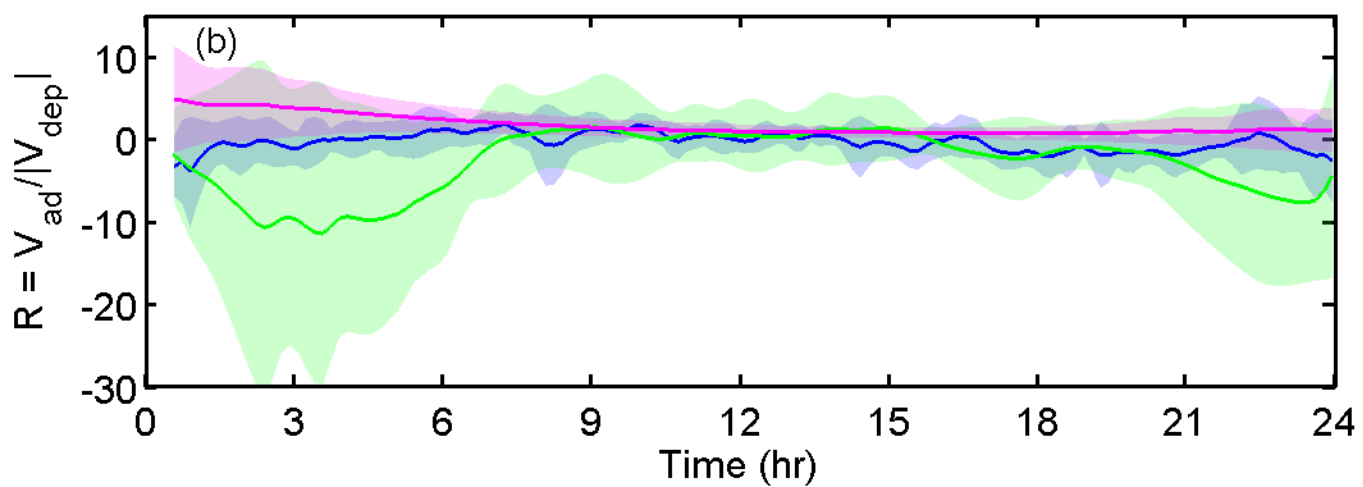

Case 3

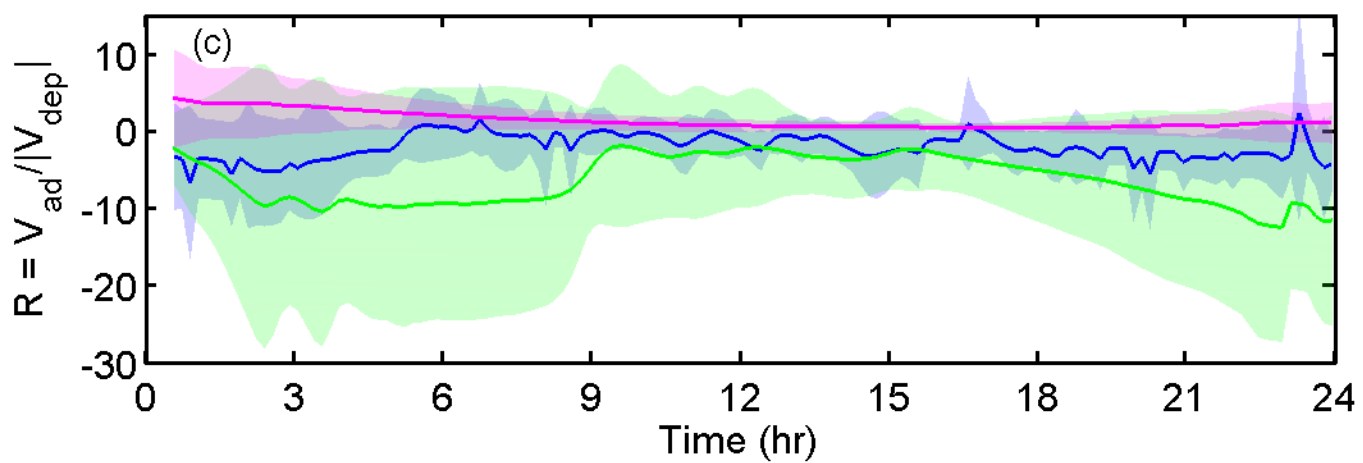

Supplement: Supplementary file 4 [file FS4.pdf › FS4.pdf]

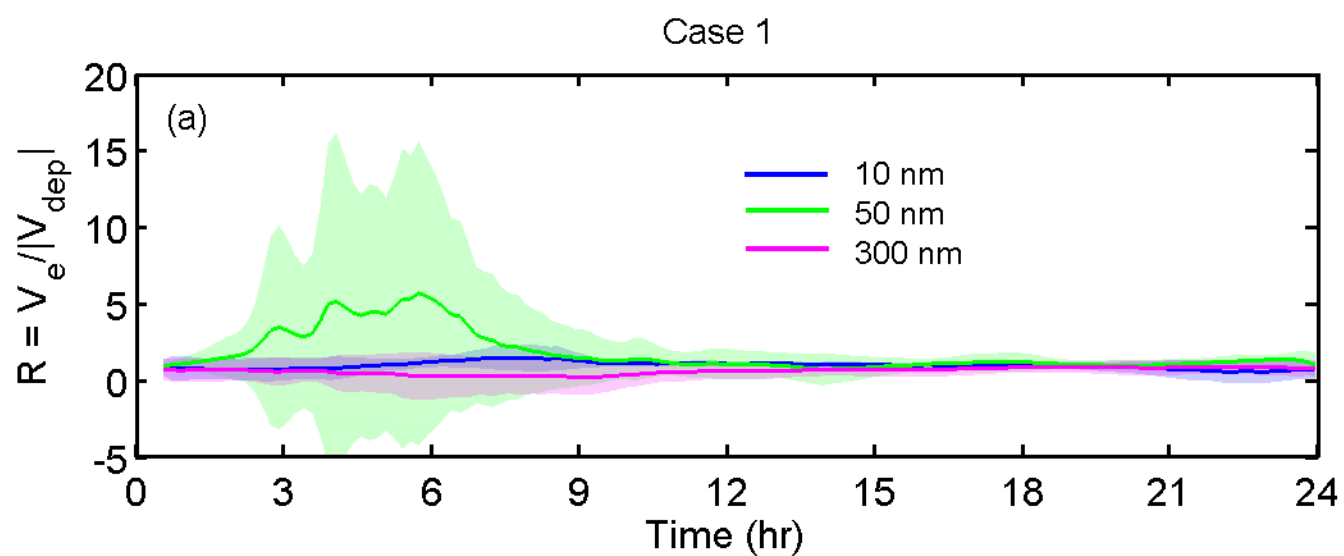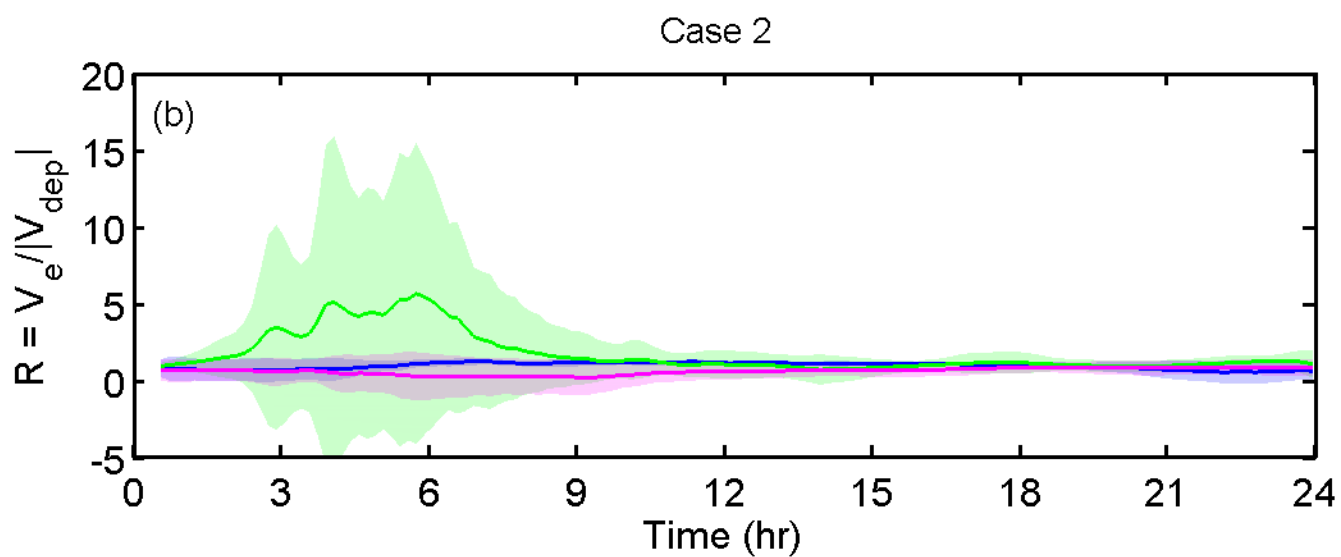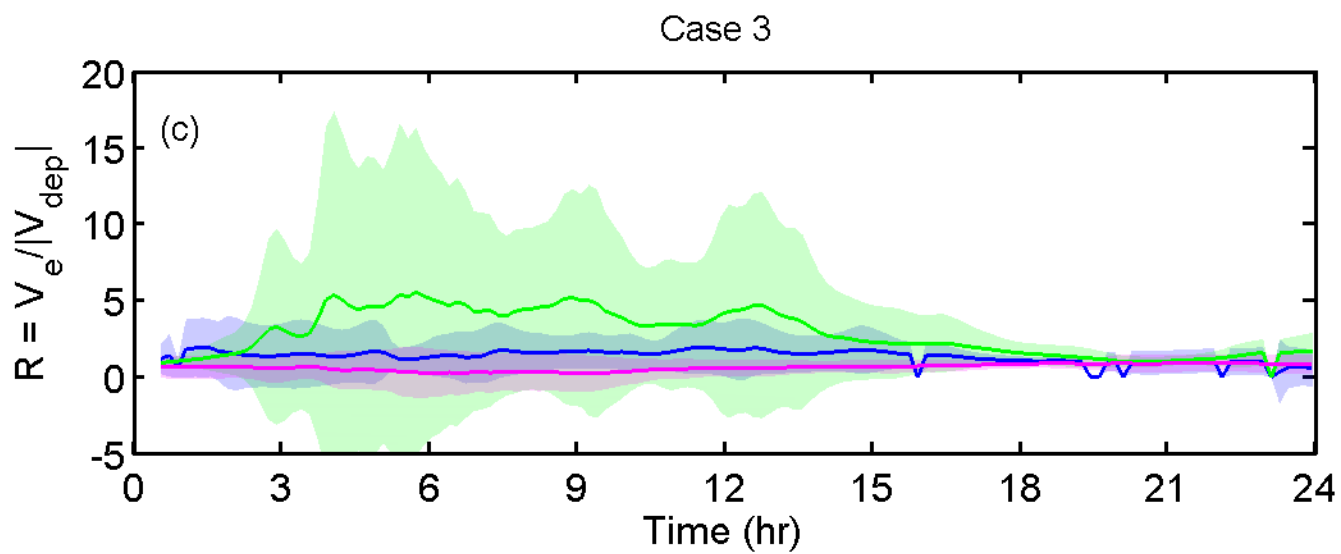

Supplement: Supplementary file 5 [file FS5.pdf › FS5.pdf]
